# Supplementary material for: Baseline monocyte and its classical subtype may predict efficacy of PD-1/PD-L1 inhibitor in cancers
Source: Oxford University Press journal article supplement (doi:10.1042/bsr20202613), 2021-01-01
Supplement: bsr-2020-2613_supp.pdf [file bsr-2020-2613_supp.pdf]

**Supplemental table 1 Baseline characteristics**

| Tumor type/site          | Number | Sex  |        | PD-L1 |   | MSI/MMR |   | EBER |    | TMB |      | Agents |   |   |    |   |
|--------------------------|--------|------|--------|-------|---|---------|---|------|----|-----|------|--------|---|---|----|---|
|                          |        | Male | Female | -     | + | -       | + | -    | +  | Low | High | A      | C | L | S  | H |
| <b>nasopharynx</b>       | 28     | 16   | 12     | 2     | 3 | 3       | 0 | 1    | 13 | 0   | 0    | 16     | 1 | 1 | 10 | 0 |
| <b>breast</b>            | 12     | 0    | 12     | 3     | 1 | 6       | 0 | 7    | 1  | 4   | 1    | 0      | 0 | 4 | 2  | 6 |
| <b>esophagus</b>         | 10     | 8    | 2      | 3     | 1 | 2       | 0 | 2    | 0  | 2   | 0    | 7      | 0 | 0 | 0  | 3 |
| <b>lymphoma</b>          | 5      | 2    | 3      | 0     | 0 | 0       | 0 | 1    | 0  | 0   | 0    | 0      | 2 | 0 | 0  | 3 |
| <b>NSCLC</b>             | 5      | 3    | 2      | 1     | 0 | 2       | 0 | 2    | 1  | 1   | 0    | 0      | 0 | 1 | 2  | 2 |
| <b>SCLC</b>              | 1      | 0    | 1      | 0     | 0 | 0       | 0 | 0    | 0  | 0   | 0    | 0      | 0 | 0 | 1  | 0 |
| <b>melanoma</b>          | 2      | 1    | 1      | 1     | 0 | 1       | 0 | 1    | 0  | 1   | 0    | 0      | 0 | 0 | 1  | 1 |
| <b>ICC</b>               | 1      | 1    | 0      | 1     | 0 | 0       | 1 | 0    | 0  | 0   | 1    | 0      | 0 | 0 | 0  | 1 |
| <b>cervix uteri</b>      | 3      | 0    | 3      | 1     | 0 | 0       | 0 | 1    | 0  | 0   | 0    | 0      | 0 | 0 | 3  | 0 |
| <b>colon</b>             | 6      | 6    | 0      | 2     | 0 | 2       | 3 | 2    | 0  | 2   | 1    | 0      | 0 | 1 | 1  | 4 |
| <b>mesenchymal tumor</b> | 1      | 1    | 0      | 0     | 0 | 0       | 0 | 0    | 0  | 0   | 1    | 0      | 1 | 0 | 0  | 0 |
| <b>kidney</b>            | 2      | 2    | 0      | 1     | 0 | 2       | 0 | 1    | 1  | 1   | 0    | 0      | 0 | 0 | 1  | 1 |
| <b>neuroendocrine</b>    | 4      | 3    | 1      | 2     | 0 | 3       | 0 | 4    | 0  | 2   | 0    | 0      | 0 | 0 | 1  | 3 |
| <b>sarcoma</b>           | 2      | 1    | 1      | 1     | 0 | 2       | 0 | 2    | 0  | 2   | 0    | 0      | 0 | 0 | 0  | 2 |
| <b>pancreas</b>          | 3      | 2    | 1      | 0     | 1 | 1       | 1 | 2    | 0  | 2   | 0    | 0      | 1 | 0 | 0  | 2 |
| <b>CUP</b>               | 2      | 2    | 0      | 0     | 1 | 1       | 0 | 0    | 2  | 0   | 1    | 0      | 0 | 0 | 2  | 0 |
| <b>rectum</b>            | 5      | 3    | 2      | 2     | 0 | 3       | 1 | 0    | 0  | 1   | 2    | 0      | 1 | 1 | 0  | 3 |
| <b>HCC</b>               | 4      | 4    | 0      | 0     | 1 | 0       | 0 | 0    | 0  | 0   | 0    | 4      | 0 | 0 | 0  | 0 |
| <b>larynx</b>            | 2      | 2    | 0      | 1     | 0 | 0       | 0 | 0    | 0  | 0   | 0    | 0      | 0 | 1 | 1  | 0 |
| <b>stomach</b>           | 2      | 1    | 1      | 1     | 0 | 1       | 0 | 1    | 1  | 1   | 0    | 1      | 0 | 0 | 0  | 1 |
| <b>ovary</b>             | 2      | 0    | 2      | 1     | 0 | 0       | 1 | 2    | 0  | 0   | 1    | 0      | 0 | 0 | 1  | 1 |
| <b>hypopharynx</b>       | 1      | 1    | 0      | 0     | 0 | 0       | 0 | 0    | 0  | 0   | 0    | 0      | 0 | 1 | 0  | 0 |
| <b>MPNST</b>             | 1      | 1    | 0      | 0     | 0 | 1       | 0 | 1    | 0  | 1   | 0    | 0      | 0 | 0 | 1  | 0 |

|                    |            |           |           |           |          |           |          |           |           |           |          |           |          |           |           |           |
|--------------------|------------|-----------|-----------|-----------|----------|-----------|----------|-----------|-----------|-----------|----------|-----------|----------|-----------|-----------|-----------|
| <b>gallbladder</b> | 1          | 1         | 0         | 0         | 0        | 1         | 0        | 0         | 0         | 0         | 0        | 0         | 1        | 0         | 0         | 0         |
| <b>chordoma</b>    | 1          | 1         | 0         | 1         | 0        | 0         | 1        | 1         | 0         | 0         | 1        | 0         | 0        | 0         | 1         | 0         |
| <b>endometrium</b> | 1          | 0         | 1         | 0         | 0        | 0         | 0        | 0         | 0         | 0         | 0        | 0         | 0        | 1         | 0         | 0         |
| <b>overall</b>     | <b>107</b> | <b>62</b> | <b>45</b> | <b>24</b> | <b>8</b> | <b>31</b> | <b>8</b> | <b>31</b> | <b>19</b> | <b>20</b> | <b>9</b> | <b>28</b> | <b>7</b> | <b>11</b> | <b>28</b> | <b>33</b> |

NSCLC: non-small cell lung cancer; SCLC: small cell lung cancer; ICC: intrahepatic cholangiocarcinoma; CUP: cancer of unknown primary; HCC: hepatocellular carcinoma; MPNST: malignant peripheral nerve sheath tumor; CR: complete response; PR: partial response; SD: stable disease; PD: progression disease; UK: response not evaluated yet; MSI/MMR: + means MSI-H or dMMR, - means MSS or MSI-L or pMMR; TMB: low means TMB < 10 mutations/Mb, high means TMB $\geq$ 10 mutations /Mb; A: ATEZOLIZUMAB; C: CS1001; L: LP002; S: SHR1316; H: HX008.

**Supplemental table 2 Detailed information of PD-L1, MSI/MMR, EBER and TMB**

| Number | Tumor type   | PD-L1    | MSI/MMR | EBER     | TMB  |
|--------|--------------|----------|---------|----------|------|
| 1      | nasopharynx  | UK       | UK      | UK       | UK   |
| 2      | nasopharynx  | UK       | UK      | negative | UK   |
| 3      | nasopharynx  | UK       | UK      | UK       | UK   |
| 4      | nasopharynx  | UK       | UK      | positive | UK   |
| 5      | nasopharynx  | UK       | low     | positive | UK   |
| 6      | nasopharynx  | positive | low     | positive | UK   |
| 7      | nasopharynx  | negative | low     | positive | UK   |
| 8      | nasopharynx  | UK       | UK      | positive | UK   |
| 9      | nasopharynx  | UK       | UK      | UK       | UK   |
| 10     | nasopharynx  | UK       | UK      | UK       | UK   |
| 11     | nasopharynx  | UK       | UK      | UK       | UK   |
| 12     | nasopharynx  | UK       | UK      | positive | UK   |
| 13     | nasopharynx  | negative | UK      | positive | UK   |
| 14     | nasopharynx  | positive | UK      | UK       | UK   |
| 15     | nasopharynx  | UK       | UK      | UK       | UK   |
| 16     | nasopharynx  | UK       | UK      | UK       | UK   |
| 17     | nasopharynx  | UK       | UK      | positive | UK   |
| 18     | nasopharynx  | UK       | UK      | UK       | UK   |
| 19     | nasopharynx  | UK       | UK      | UK       | UK   |
| 20     | nasopharynx  | UK       | UK      | positive | UK   |
| 21     | nasopharynx  | UK       | UK      | UK       | UK   |
| 22     | nasopharynx  | positive | UK      | positive | UK   |
| 23     | nasopharynx  | UK       | UK      | UK       | UK   |
| 24     | nasopharynx  | UK       | UK      | UK       | UK   |
| 25     | nasopharynx  | UK       | UK      | positive | UK   |
| 26     | nasopharynx  | UK       | UK      | positive | UK   |
| 27     | nasopharynx  | UK       | UK      | positive | UK   |
| 28     | nasopharynx  | UK       | UK      | UK       | UK   |
| 29     | gallbladder  | UK       | low     | UK       | UK   |
| 30     | melanoma     | negative | low     | negative | low  |
| 31     | melanoma     | UK       | UK      | UK       | UK   |
| 32     | MPNST        | UK       | low     | negative | low  |
| 33     | NSCLC        | UK       | UK      | negative | UK   |
| 34     | NSCLC        | UK       | UK      | UK       | UK   |
| 35     | NSCLC        | negative | low     | positive | low  |
| 36     | NSCLC        | UK       | UK      | UK       | UK   |
| 37     | NSCLC        | UK       | low     | negative | UK   |
| 38     | SCLC         | UK       | UK      | UK       | UK   |
| 39     | HCC          | UK       | UK      | UK       | UK   |
| 40     | HCC          | UK       | UK      | UK       | UK   |
| 41     | HCC          | positive | UK      | UK       | UK   |
| 42     | HCC          | UK       | UK      | UK       | UK   |
| 43     | ICC          | negative | high    | UK       | high |
| 44     | cervix uteri | negative | UK      | UK       | UK   |
| 45     | cervix uteri | UK       | UK      | UK       | UK   |
| 46     | cervix uteri | UK       | UK      | negative | UK   |
| 47     | larynx       | UK       | UK      | UK       | UK   |
| 48     | larynx       | negative | UK      | UK       | UK   |
| 49     | chordoma     | negative | high    | negative | high |
| 50     | colon        | UK       | low     | UK       | low  |

|     |                   |          |      |          |      |
|-----|-------------------|----------|------|----------|------|
| 51  | colon             | UK       | high | UK       | UK   |
| 52  | colon             | UK       | UK   | UK       | UK   |
| 53  | colon             | UK       | high | negative | UK   |
| 54  | colon             | negative | high | negative | high |
| 55  | colon             | negative | low  | UK       | low  |
| 56  | mesenchymal tumor | UK       | UK   | UK       | high |
| 57  | lymphoma          | UK       | UK   | negative | UK   |
| 58  | lymphoma          | UK       | UK   | UK       | UK   |
| 59  | lymphoma          | UK       | UK   | UK       | UK   |
| 60  | lymphoma          | UK       | UK   | UK       | UK   |
| 61  | lymphoma          | UK       | UK   | UK       | UK   |
| 62  | ovary             | UK       | UK   | negative | UK   |
| 63  | ovary             | negative | high | negative | high |
| 64  | sarcoma           | UK       | low  | negative | low  |
| 65  | sarcoma           | negative | low  | negative | low  |
| 66  | breast            | UK       | low  | negative | UK   |
| 67  | breast            | UK       | UK   | UK       | UK   |
| 68  | breast            | negative | low  | negative | high |
| 69  | breast            | UK       | UK   | negative | low  |
| 70  | breast            | UK       | UK   | UK       | UK   |
| 71  | breast            | negative | low  | negative | low  |
| 72  | breast            | UK       | low  | positive | UK   |
| 73  | breast            | negative | low  | negative | low  |
| 74  | breast            | positive | low  | negative | low  |
| 75  | breast            | UK       | UK   | UK       | UK   |
| 76  | breast            | UK       | UK   | UK       | UK   |
| 77  | breast            | UK       | UK   | negative | UK   |
| 78  | neuroendocrine    | UK       | low  | negative | UK   |
| 79  | neuroendocrine    | negative | low  | negative | low  |
| 80  | neuroendocrine    | UK       | UK   | negative | UK   |
| 81  | neuroendocrine    | negative | low  | negative | low  |
| 82  | kidney            | negative | low  | positive | low  |
| 83  | kidney            | UK       | low  | negative | UK   |
| 84  | esophagus         | UK       | UK   | UK       | UK   |
| 85  | esophagus         | positive | UK   | UK       | UK   |
| 86  | esophagus         | UK       | UK   | UK       | UK   |
| 87  | esophagus         | negative | UK   | UK       | UK   |
| 88  | esophagus         | UK       | UK   | UK       | UK   |
| 89  | esophagus         | UK       | UK   | UK       | UK   |
| 90  | esophagus         | UK       | UK   | UK       | UK   |
| 91  | esophagus         | negative | low  | negative | low  |
| 92  | esophagus         | UK       | UK   | UK       | UK   |
| 93  | esophagus         | negative | low  | negative | low  |
| 94  | stomach           | UK       | UK   | positive | UK   |
| 95  | stomach           | negative | low  | negative | low  |
| 96  | hypopharynx       | UK       | UK   | UK       | UK   |
| 97  | pancreas          | UK       | high | UK       | UK   |
| 98  | pancreas          | UK       | UK   | negative | low  |
| 99  | pancreas          | positive | low  | negative | low  |
| 100 | CUP               | positive | low  | positive | high |
| 101 | CUP               | UK       | UK   | positive | UK   |
| 102 | rectum            | negative | low  | UK       | low  |
| 103 | rectum            | UK       | high | UK       | UK   |
| 104 | rectum            | UK       | UK   | UK       | high |
| 105 | rectum            | negative | low  | UK       | high |

|     |             |    |     |    |    |
|-----|-------------|----|-----|----|----|
| 106 | rectum      | UK | low | UK | UK |
| 107 | endometrium | UK | UK  | UK | UK |

NSCLC: non-small cell lung cancer; SCLC: small cell lung cancer; ICC: intrahepatic cholangiocarcinoma; CUP: cancer of unknown primary; HCC: hepatocellular carcinoma; MPNST: malignant peripheral nerve sheath tumor; UK: results unknown

**Supplemental table 3 Clinical benefit rate of agents**

|                    | <b>ATEZOLI</b> | <b>CS1001</b> | <b>HX008</b> | <b>LP002</b> | <b>SHR1316</b> | <b>P</b> |
|--------------------|----------------|---------------|--------------|--------------|----------------|----------|
| <b>ZUMAB</b>       |                |               |              |              |                |          |
| <b>benefit</b>     | 19<br>67.9%    | 4<br>57.1%    | 14<br>42.4%  | 5<br>45.5%   | 16<br>57.1%    | 0.354    |
| <b>non-benefit</b> | 9<br>32.1%     | 3<br>42.9%    | 19<br>57.6%  | 6<br>54.5%   | 12<br>42.9%    |          |

**Supplemental table 4 Clinical benefit rate of different dose levels**

|                    | <b>1mg/kg</b> | <b>3mg/kg</b> | <b>10mg/kg</b> | <b>20mg/kg</b> | <b>200mg</b> | <b>1200mg</b> | <b><i>P</i></b> |
|--------------------|---------------|---------------|----------------|----------------|--------------|---------------|-----------------|
| <b>benefit</b>     | 4             | 5             | 13             | 6              | 7            | 23            | 0.688           |
|                    | 44.4%         | 45.5%         | 50.0%          | 46.2%          | 53.8%        | 65.7%         |                 |
| <b>non-benefit</b> | 5             | 6             | 13             | 7              | 6            | 12            |                 |
|                    | 55.6%         | 54.5%         | 50.0%          | 53.8%          | 46.2%        | 34.3%         |                 |

**Supplemental table 5 Biomarkers assessment**

| <b>parameters</b> | <b>Benefit</b> | <b>Non-benefit</b> | <b><i>P</i> value</b> |
|-------------------|----------------|--------------------|-----------------------|
| PD-L1 expression  |                |                    | 1.00                  |
| positive          | 4              | 4                  |                       |
| negative          | 12             | 12                 |                       |
| MSI/MMR           |                |                    | 0.697                 |
| MSI-H/dMMR        | 3              | 5                  |                       |
| MSI-L/MSS/pMMR    | 14             | 17                 |                       |
| EBER              |                |                    | 0.608                 |
| positive          | 10             | 9                  |                       |
| negative          | 14             | 17                 |                       |
| TMB               |                |                    | 0.822                 |
| ≥10 mutations /Mb | 4              | 5                  |                       |
| < 10 mutations/Mb | 8              | 12                 |                       |



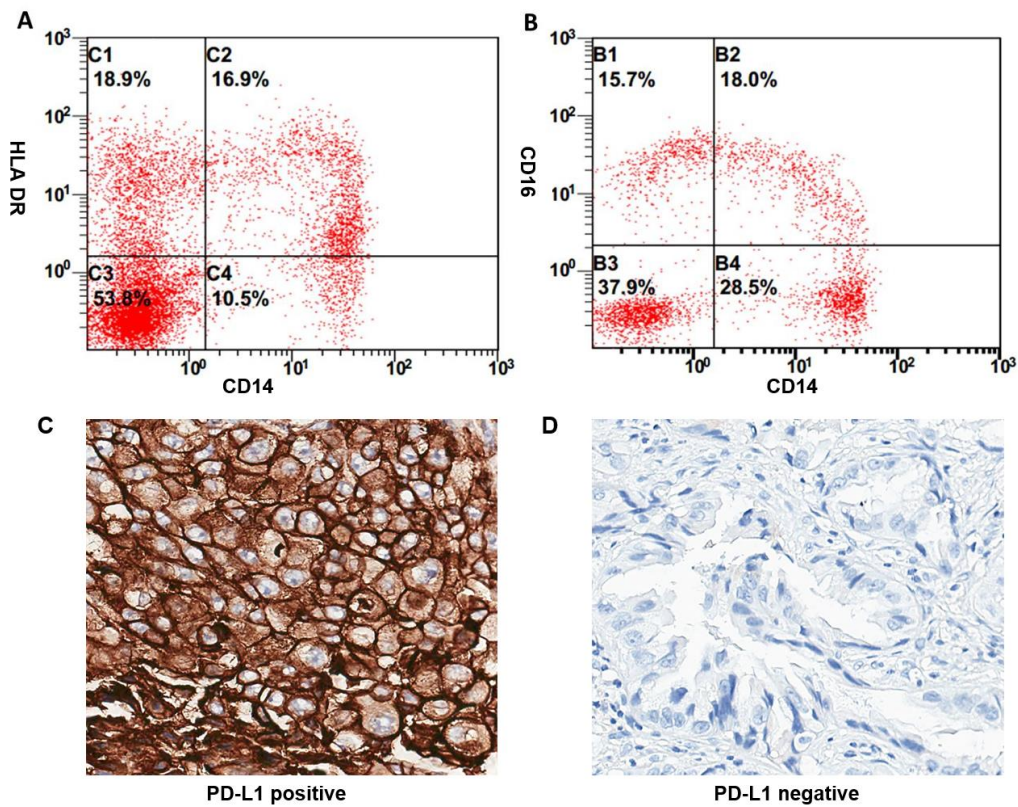

**Supplemental figure 1 representative images for PD-L1 staining and flow cytometry**

A: representative image of flow cytometry for gating strategy of CD14 and HLA DR. B: representative image of flow cytometry for gating strategy of CD14 and CD16. C: representative image of PD-L1 positive staining. D: representative image of PD-L1 negative staining.

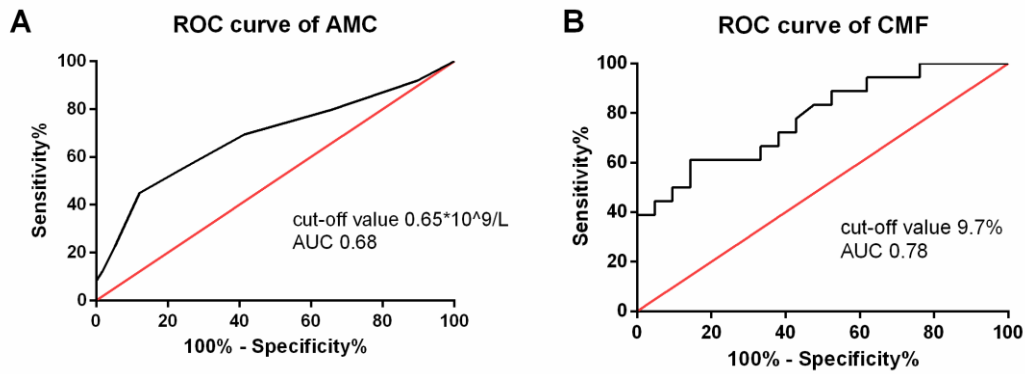

### Supplemental figure 2 ROC curve of AMC and CMF

A:  $0.65 \times 10^9/L$  was the best cut-off value to class AMC into high and low group with sensitivity of 87.9% and specificity of 44.9%. B: 9.7% was used to discriminate CMF from high and low groups with area under curve of 0.78, the sensitivity of 85.7% and specificity of 61.1%.

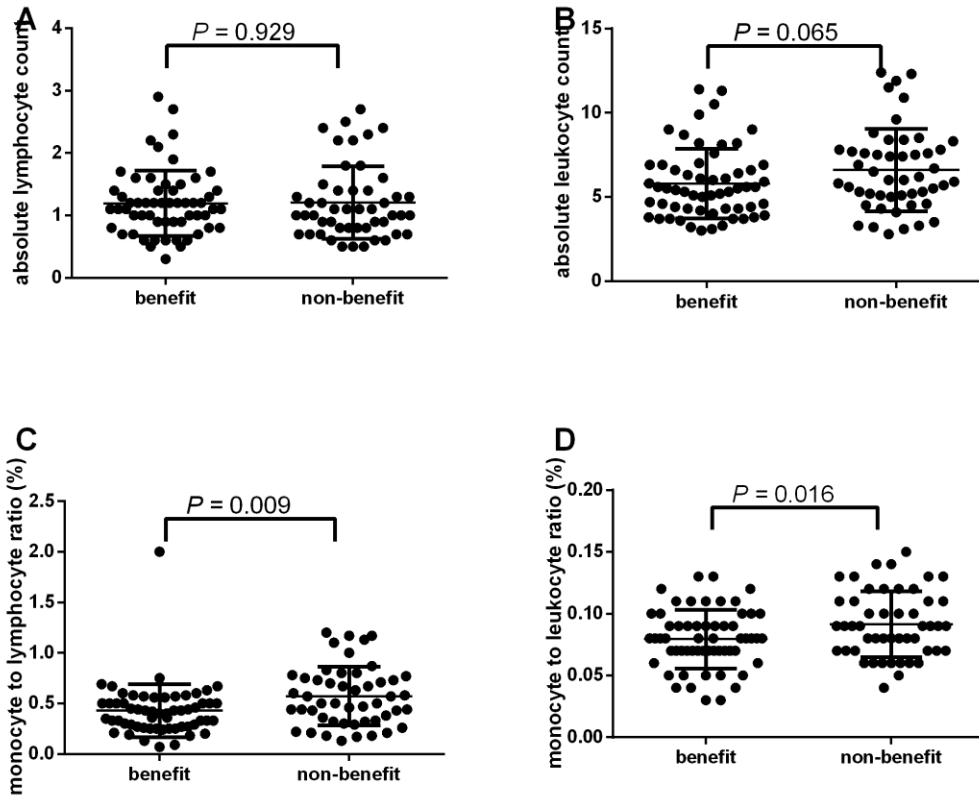

### Supplemental figure 3 Lymphocyte and leukocyte assessment

A: There was no significant difference in the number of lymphocytes between benefit group (n=58) and non-benefit group (n=49) ( $P=0.929$ ). B: There was no significant difference in the number of leukocytes between benefit group (n=58) and non-benefit group (n=49) ( $P=0.065$ ). C: The benefit group (n=58) had significantly lower monocyte to lymphocyte ratio than the non-benefit group (n=49) ( $P=0.009$ ). D: The benefit group (n=58) had significantly lower monocyte to leukocyte ratio than the non-benefit group (n=49) ( $P=0.016$ ).
